# Supplementary material for: Soft salts based on platinum(ii) complexes with high emission quantum efficiencies in the near infrared region for in vivo imaging
Source: Royal Society of Chemistry journal article supplement (doi:10.1039/d0cc05366j), 2020-01-01
Supplement: d0cc05366j1.pdf [file d0cc05366j1.pdf]

## Electronic Supporting Information

### Soft salts based on platinum(II) complexes with high emission quantum efficiencies in the near infrared region for *in vivo* imaging

Jun Li,<sup>‡a</sup> Yun Ma,<sup>‡b,c,d</sup> Suyi Liu,<sup>d</sup> Zhu Mao,<sup>e</sup> Zhenguo Chi,<sup>e</sup> Peng-Cheng Qian<sup>\*f</sup> and Wai-Yeung Wong<sup>\*a,b,c</sup>

<sup>a</sup> Department of Chemistry, Hong Kong Baptist University, Waterloo Road, Hong Kong, P. R. China.

<sup>b</sup> Department of Applied Biology and Chemical Technology, The Hong Kong Polytechnic University, Hung Hom, Hong Kong, P. R. China. E-mail: wai-yeung.wong@polyu.edu.hk

<sup>c</sup> The Hong Kong Polytechnic University Shenzhen Research Institute Shenzhen, P. R. China.

<sup>d</sup> Key Laboratory for Organic Electronics and Information Displays (KLOEID) and Institute of Advanced Materials (IAM), Nanjing University of Posts and Telecommunications (NUPT), 9 Wenyuan Road, Nanjing 210023, Jiangsu, P. R. China.

<sup>e</sup> PCFM Lab, GD HPPC Lab, Guangdong Engineering Technology Research Center for High-performance Organic and Polymer Photoelectric Functional Films, State Key Laboratory of Optoelectronic Material and Technologies, School of Chemistry, Sun Yat-Sen University, Guangzhou 510275, P. R. China.

<sup>f</sup> Key Laboratory of Environmental Functional Materials Technology and Application of Wenzhou City, Institute of New Materials & Industry, College of Chemistry & Materials Engineering, Wenzhou University, Wenzhou 325035, P. R. China.

<sup>‡</sup> These authors contributed equally to this work

## Experimental section

### General

All the chemicals and solvents were purchased from commercial suppliers and were used without any further purification.  $^1\text{H}$  and  $^{13}\text{C}$  NMR spectra were obtained on a Bruker Ultrashield 400 MHz FT-NMR spectrometer in  $\text{CDCl}_3$  or  $\text{DMSO-}d_6$  with tetramethylsilane (TMS) as an internal standard. Infrared spectra were collected on Nicolet Magna 550 Series II FTIR spectrometer using KBr pellets for solid state measurements. Mass spectra were measured on a Bruker Autoflex matrix assisted laser desorption/ionization time of flight mass spectrometer (MALDI-TOF MS). X-Ray diffraction (XRD) data were collected using graphite-monochromated  $\text{Mo-K}\alpha$  radiation ( $\lambda = 0.71073 \text{ \AA}$ ) on a Bruker APEX DUO diffractometer at 293 K. UV-visible absorption spectra were recorded with a Cary 100 UV-Vis spectrophotometer. Photoluminescence spectra of the solution were obtained on the LS50B fluorescence spectrophotometer. The solid-state photophysical properties including emission, lifetime and quantum efficiency were recorded on a HORIBA/Fluorolog-3 combined fluorescence lifetime and steady state spectrometer.

### Synthesis of the anionic Pt(II) complexes:

The corresponding Pt-dimer was refluxed with 10 equivalents of tetrabutylammonium cyanide for 6 hours with stirring.<sup>1</sup> After cooling down to room temperature, the solvent was removed under reduced pressure. The residue was dissolved in 20 mL DCM and was washed with water (20 mL x 3) to obtain the crude products, which were further purified by recrystallization from  $\text{CH}_2\text{Cl}_2/\text{Et}_2\text{O}$  to give the corresponding anionic Pt(II) complexes in quantitative yields.

**A1:** Yellow-green solid. Yield 38%.  $^1\text{H}$  NMR (400 MHz,  $\text{CDCl}_3$ ):  $\delta$  (ppm) 9.45 (d, 1H, Ar), 8.07 (d, 1H, Ar), 7.84 (t, 1H, Ar), 7.71 (dd, 1H, Ar), 7.11 (t, 1 H, Ar), 6.49 (ddd, 1H, Ar), 3.27-3.33 (m, 8H,  $\text{CH}_2$ ), 1.56-1.72 (m, 8H,  $\text{CH}_2$ ), 1.41 (q, 8H,  $\text{CH}_2$ ), 0.94 (t, 12H,  $\text{CH}_3$ ).  $^{13}\text{C}$  NMR (100 MHz,  $\text{CDCl}_3$ ):  $\delta$  (ppm) 163.62, 161.36, 160.92, 157.89, 152.30, 143.23, 138.21, 128.91, 121.75, 121.43, 119.58, 115.99, 98.86, 57.76, 23.01, 18.61, 12.63. Negative ESI-MS:  $m/z = 436.2$

(calc.  $C_{18}H_6F_2N_3Pt = 437.1$ ), positive ESI-MS:  $m/z = 242.7$  (calc.  $C_{16}H_{36}N = 242.2$ ).

IR ( $cm^{-1}$ ): 2131, 2119 for  $C\equiv N$  stretching.

**A2:** Orange solid. Yield 47%.  $^1H$  NMR (400 MHz,  $CDCl_3$ ):  $\delta$  (ppm) 9.30-9.32 (d, 1H, Ar), 8.76-8.78 (d, 1H, Ar), 8.24-8.26 (d, 1H, Ar), 7.96-7.98 (d, 1H, Ar), 7.82-7.84 (d, 1H, Ar), 7.76-7.78 (t, 1H, Ar), 7.65 (t, 1H, Ar), 7.40-7.41 (d, 1H, Ar), 7.13-7.17 (m, 2H, Ar), 3.23-3.27 (m, 8H,  $CH_2$ ), 1.53-1.60 (m, 8H,  $CH_2$ ), 1.31-1.36 (q, 8H,  $CH_2$ ), 0.85-0.89 (t, 12H,  $CH_3$ ).  $^{13}C$  NMR (100 MHz,  $CDCl_3$ ):  $\delta$  (ppm) 183.76, 169.59, 158.75, 148.22, 144.93, 138.97, 137.54, 130.53, 129.24, 128.23, 127.49, 125.45, 123.29, 120.58, 118.18, 58.73, 23.99, 19.61, 13.64. Negative ESI-MS:  $m/z = 451.1$  (calc.  $C_{17}H_{10}N_3Pt = 451.1$ ), positive ESI-MS:  $m/z = 242.2$  (calc.  $C_{16}H_{36}N = 242.2$ ). IR ( $cm^{-1}$ ): 2108, 2127 for  $C\equiv N$  stretching.

### Synthesis of the cationic Pt(II) complexes:

The corresponding Pt-dimer and 3 equivalents of ethane-1, 2- diamine were added in 20 mL dichloromethane under an argon flow and the mixture was stirred for 30 minutes at room temperature to obtain the corresponding cationic Pt(II) complexes as yellow or orange precipitates.<sup>2</sup> The resulting powder was washed with ether and DCM to give quantitative yield of the corresponding cationic Pt(II) complexes.

**C1:** Orange solid. Yield 79%.  $^1H$  NMR (400 MHz,  $DMSO-d_6$ ):  $\delta$  (ppm) 8.50-8.51 (d, 1H, Ar), 7.92-7.96 (m, 1H, Ar), 7.65-7.66 (d, 1H, Ar), 7.52-7.54 (d, 1H, Ar), 7.12-7.16 (m, 1H, Ar), 7.04-7.05 (d, 1H, Ar), 6.22 (s, 2H,  $NH_2$ ), 5.52 (s, 2H,  $NH_2$ ), 2.60 (s, 4H,  $CH_2CH_2$ ).  $^{13}C$  NMR (100 MHz,  $DMSO-d_6$ ):  $\delta$  (ppm) 162.37, 151.84, 149.63, 140.99, 140.52, 133.62, 129.65, 121.23, 118.04, 119.86, 48.83, 43.78. Positive ESI-MS:  $m/z = 415.0$  (calc.  $C_{11}H_{14}N_3PtS = 415.0$ ).

**C2:** Light yellow solid. Yield 47%.  $^1H$  NMR (400 MHz,  $DMSO-d_6$ ):  $\delta$  (ppm) 8.71-8.72 (d, 1H, Ar), 8.10-8.14 (dd, 1H, Ar), 7.95-7.97 (d, 1H, Ar), 7.36-7.39 (dd, 1H, Ar), 6.91-6.96 (m, 2H, Ar), 6.22 (s, 2H,  $NH_2$ ), 5.59 (s, 2H,  $NH_2$ ), 2.65 (s, 4H,  $CH_2CH_2$ ).  $^{13}C$  NMR (100 MHz,  $DMSO-d_6$ ):  $\delta$  (ppm) 162.35, 161.16, 161.05,

158.13, 151.64, 149.18, 128.29, 122.29, 121.10, 116.36, 47.73, 43.64. Positive ESI-MS:  $m/z = 445.1$  (calc.  $C_{13}H_{14}F_2N_3Pt = 445.1$ ).

### Synthesis of the soft salts:

The Pt(II) based soft salts were synthesized through simple metathesis reactions according to the modified procedures in the literature.<sup>3</sup> To a 5 mL ethanol solution, 1 equivalent of the anionic Pt(II) complexes and 1.1 equivalents of the cationic Pt(II) complexes were added to obtain a yellow solution. Then the mixed solution was treated under ultrasonic bath for 10 min, the yellow solution became red immediately and red precipitates were formed. Then the solution was poured into 35 mL D.I water followed by another 30 min sonication. After removing the solvent by centrifugation, the residues were washed with 10 mL D.I water and 10 mL DCM to acquire the products as red solids.

**S1:** Red solid. Yield 87%.  $^1H$  NMR (400 MHz,  $DMSO-d_6$ ):  $\delta$  (ppm) 9.31-9.32 (t, 1H, Ar), 8.47-8.48 (d, 1H, Ar), 8.08-8.18(m, 3H, Ar), 7.96-8.01 (dt, 1H, Ar), 7.46-7.71 (m, 3H, Ar), 7.18-7.21 (t, 1H, Ar), 7.05-7.06 (d, 1H, Ar), 6.87-6.93 (m, 1H, Ar), 6.17 (s, 2H,  $NH_2$ ), 5.42 (s, 2H,  $NH_2$ ), 2.64 (s, 4H,  $CH_2CH_2$ ).  $^{13}C$  NMR (100 MHz,  $DMSO-d_6$ ):  $\delta$  (ppm) 163.12 162.84, 158.74, 151.19, 148.88, 141.76, 140.59, 140.32, 140.10, 132.96, 129.71, 129.27, 124.00, 122.52, 122.32, 120.78, 119.69, 119.53, 117.64, 114.73, 99.63, 48.34, 43.33. Negative ESI-MS:  $m/z = 436.2$  (calc.  $C_{18}H_6F_2N_3Pt = 437.1$ ), positive ESI-MS:  $m/z = 415.0$  (calc.  $C_{11}H_{14}N_3PtS = 415.0$ ).

**S2:** Red solid. Yield 85%.  $^1H$  NMR (400 MHz,  $DMSO-d_6$ ):  $\delta$  (ppm) 9.12-9.14 (d, 1H, Ar), 8.79-8.81 (d, 1H, Ar), 8.62-8.64 (d, 1H, Ar), 8.13-8.17 (t, 1H, Ar), 8.01-8.06 (m, 4H, Ar), 7.88-7.92 (t, 1H, Ar), 7.79 (s, 2H, Ar), 7.41-7.44 (t, 1H, Ar), 7.14-7.15 (d, 2H, Ar), 6.95-7.14 (t, 2H, Ar), 6.90-6.92 (d, 2H, Ar), 6.11 (s, 2H,  $NH_2$ ), 5.40 (s, 2H,  $NH_2$ ), 2.66 (s, 4H,  $CH_2CH_2$ ).

$^{13}C$  NMR (100 MHz,  $DMSO-d_6$ ):  $\delta$  (ppm) 168.93, 159.90, 151.94, 149.27, 148.20, 145.33, 144.41, 141.14, 138.63, 137.53, 132.43, 130.55, 129.63, 128.03,

127.53, 125.22, 124.04, 123.52, 122.96, 121.68, 116.76, 100.38, 100.11, 99.85, 79.77, 79.44, 79.11, 48.23, 44.19. Negative ESI-MS:  $m/z = 451.1$  (calc.  $C_{17}H_{10}N_3Pt = 451.1$ ), positive ESI-MS:  $m/z = 445.1$  (calc.  $C_{13}H_{14}F_2N_3Pt = 445.1$ ).

### ***In vivo* imaging**

Animal experiments were conducted according to the guidelines of the Institutional Animal Care and Use Committee. Male BALB/c mice (~20 g) was purchased from Jiangsu KeyGEN BioTECH Corp., Ltd. The mouse was subcutaneously injected with **S2** ( $1 \times 10^{-4}$  M in 200  $\mu$ L of 1 : 99 = DMSO : PBS). As a control, the same mouse was also subcutaneously injected with DMSO/PBS solution. The mouse was then imaged (30 min after the injection) by using IVIS Lumina XR Series III MS *in vivo* imaging system, with an excitation filter of 440 nm and an emission filter of 690–740 nm.

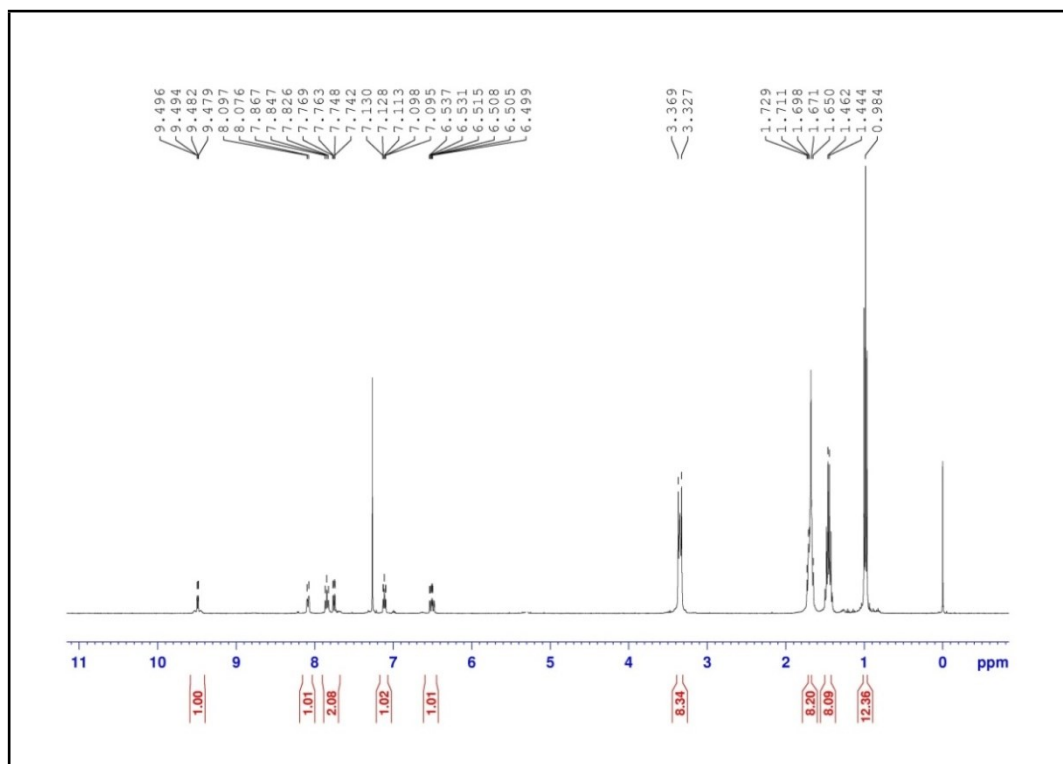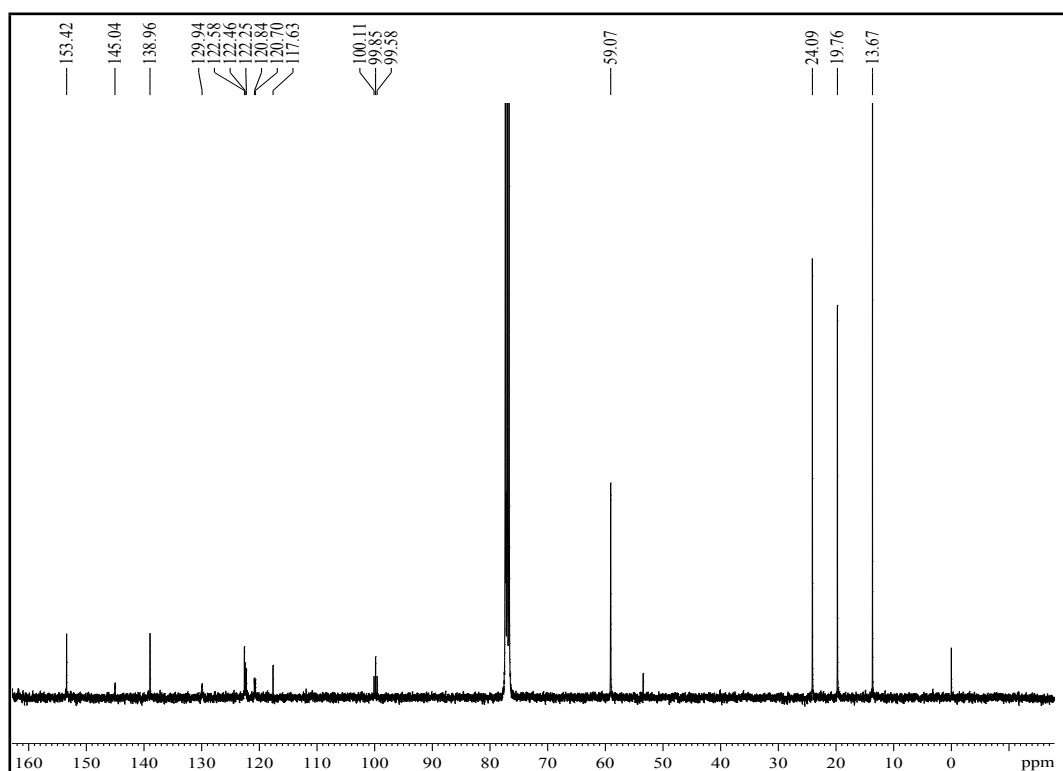

Fig. S1 <sup>1</sup>H NMR (top) and <sup>13</sup>C NMR (bottom) spectra of A1 in CDCl<sub>3</sub>

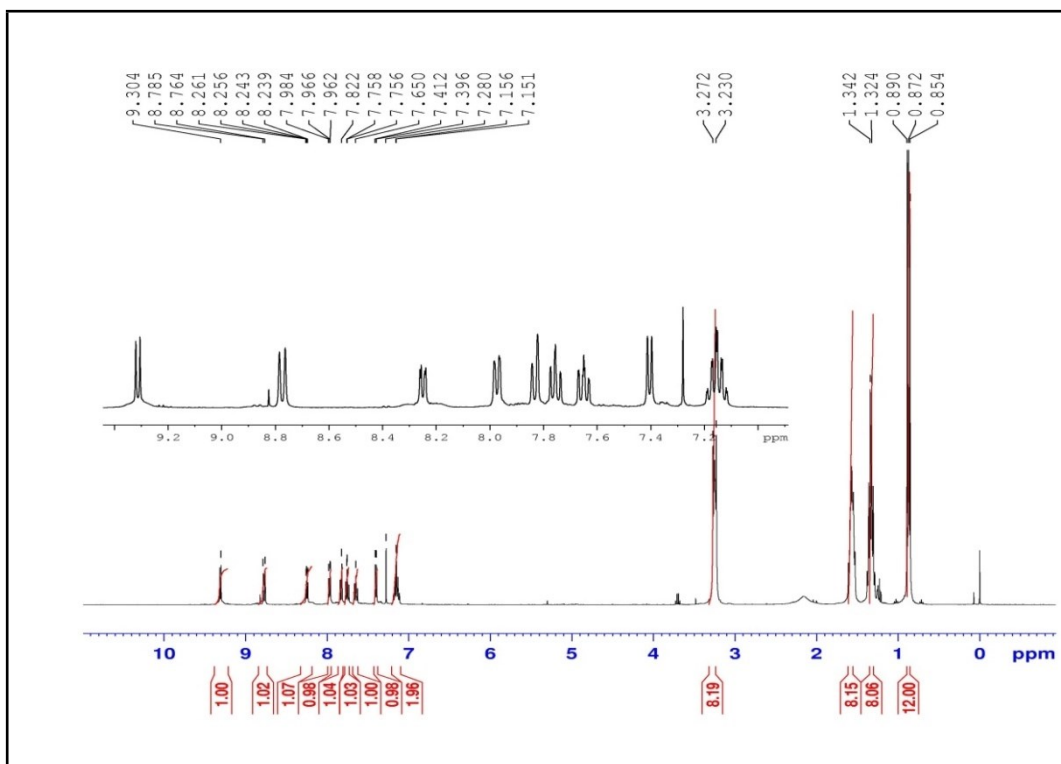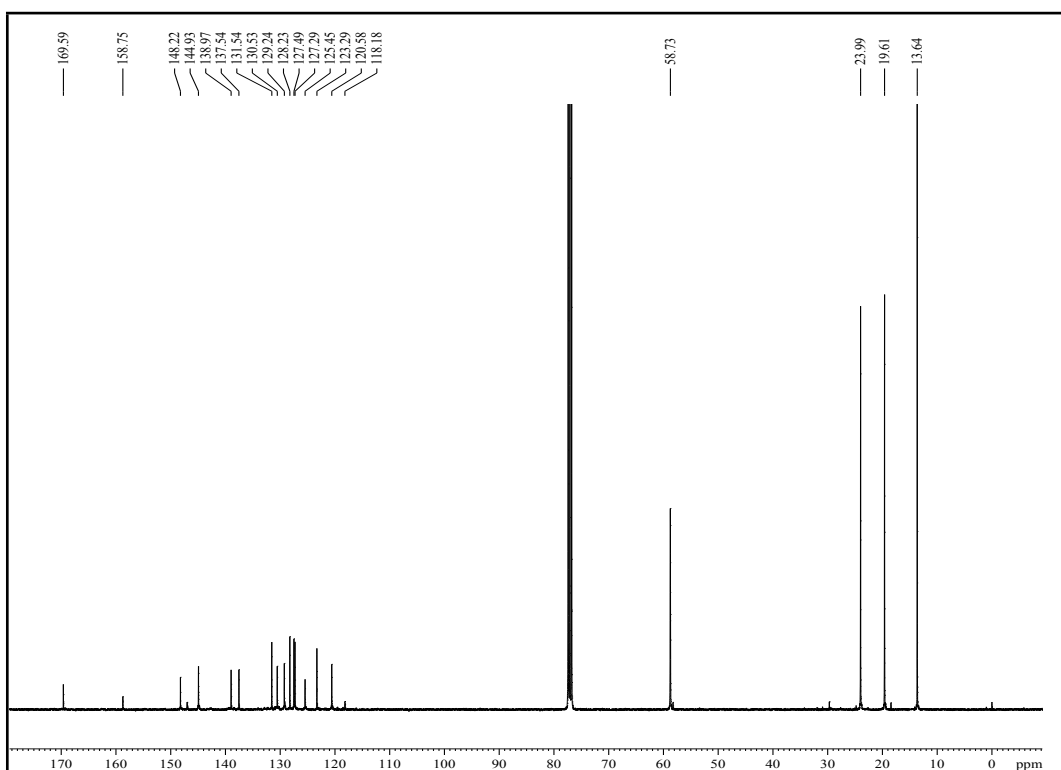

**Fig. S2** <sup>1</sup>H NMR (top) and <sup>13</sup>C NMR (bottom) spectra of **A2** in CDCl<sub>3</sub>

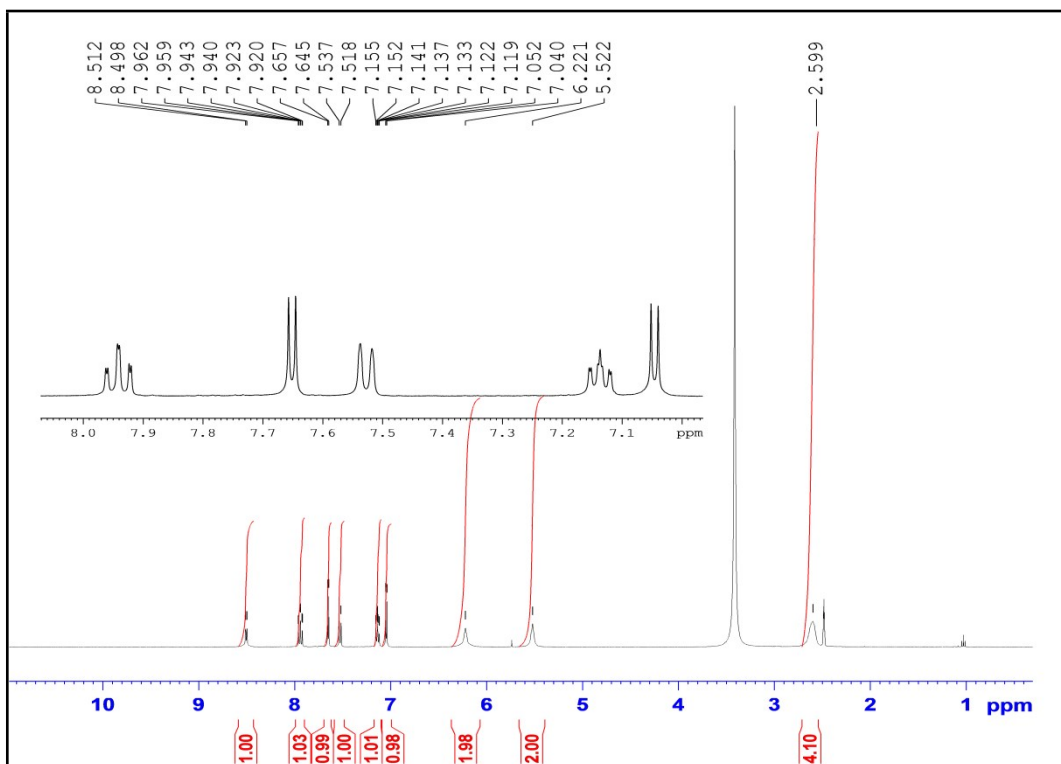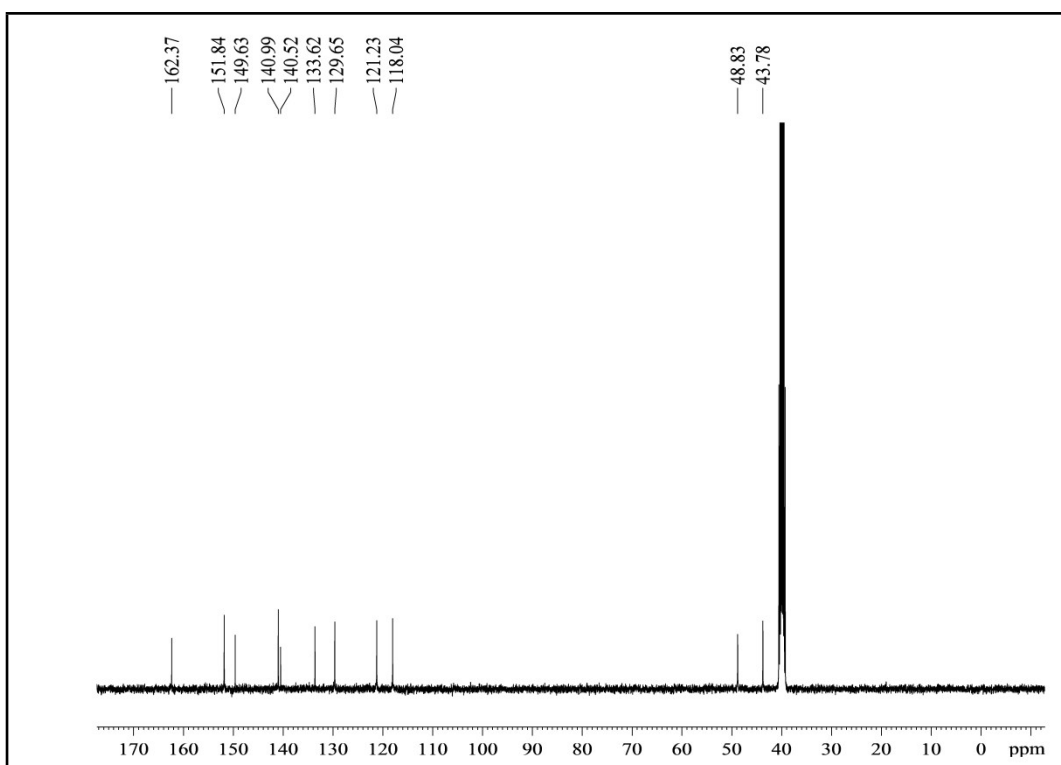

**Fig. S3**  $^1\text{H}$  NMR (top) and  $^{13}\text{C}$  NMR (bottom) spectra of complexes C1 in  $\text{DMSO-}d_6$



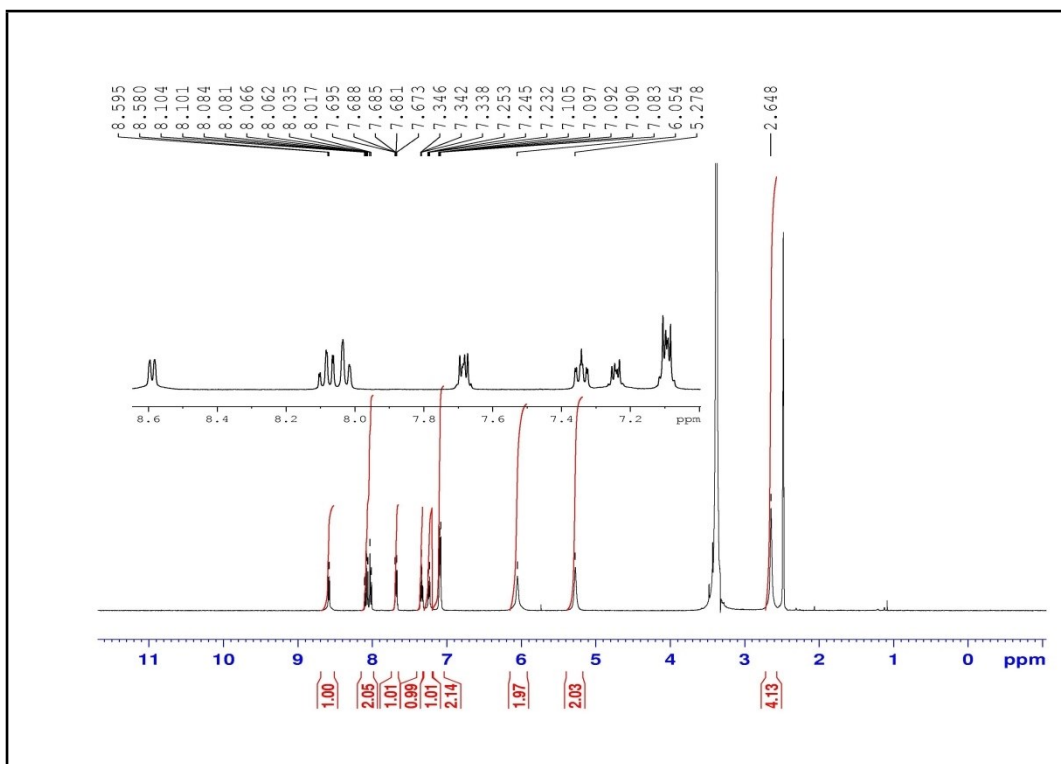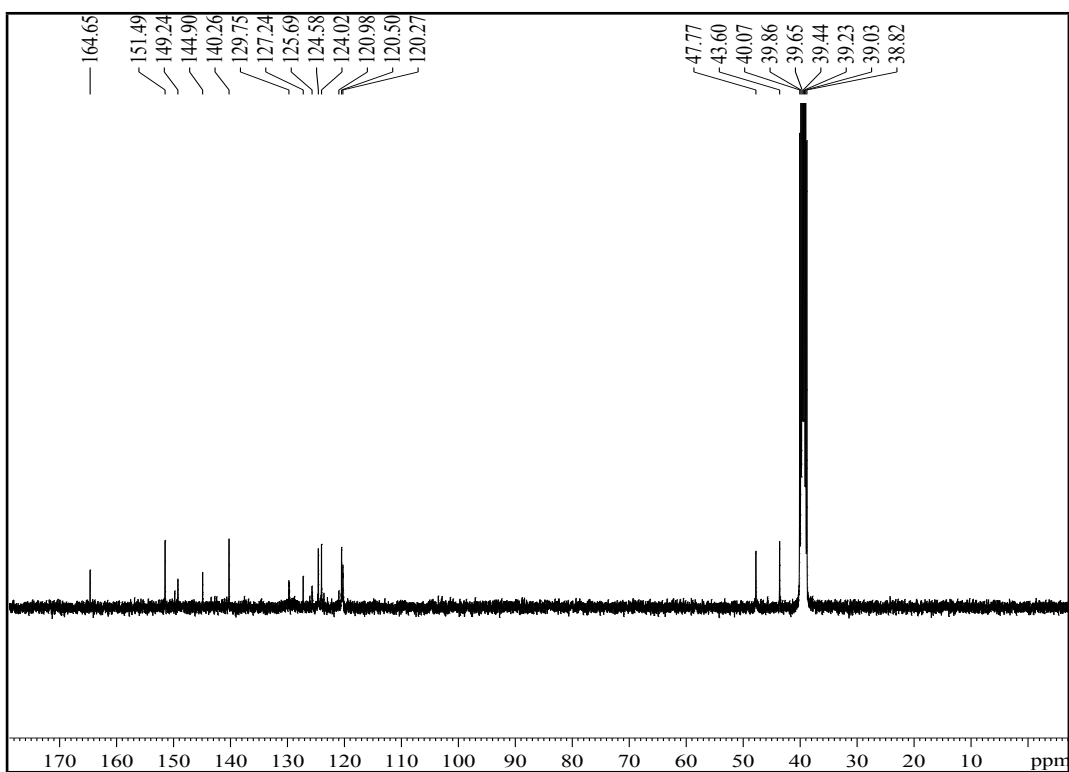

Fig. S4  $^1\text{H}$  NMR (top) and  $^{13}\text{C}$  NMR (bottom) spectra of complexes C2 in  $\text{DMSO-}d_6$

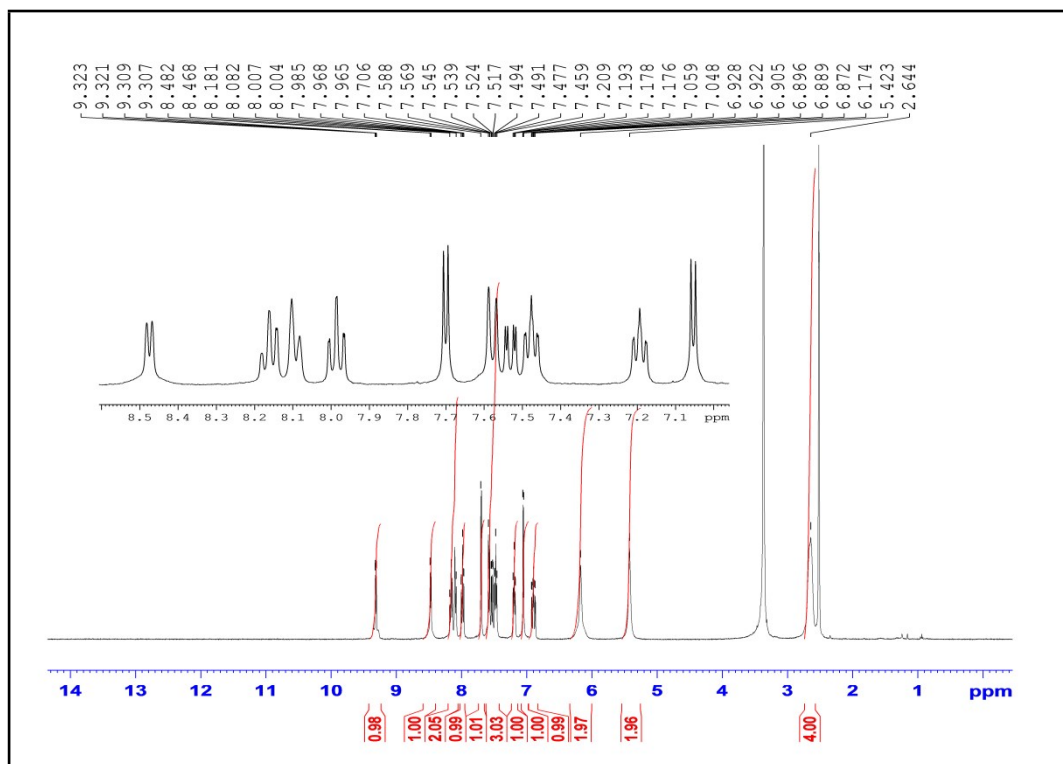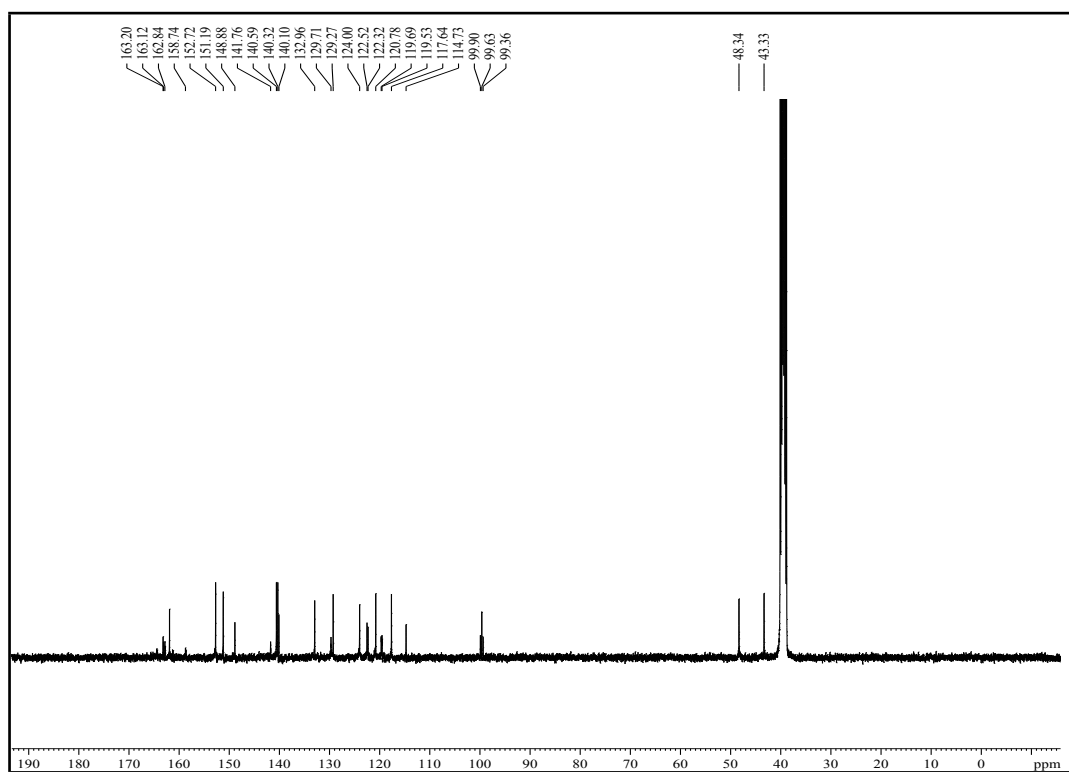

**Fig. S5** <sup>1</sup>H NMR (top) and <sup>13</sup>C NMR (bottom) spectra of complexes **S1** in DMSO-*d*<sub>6</sub>

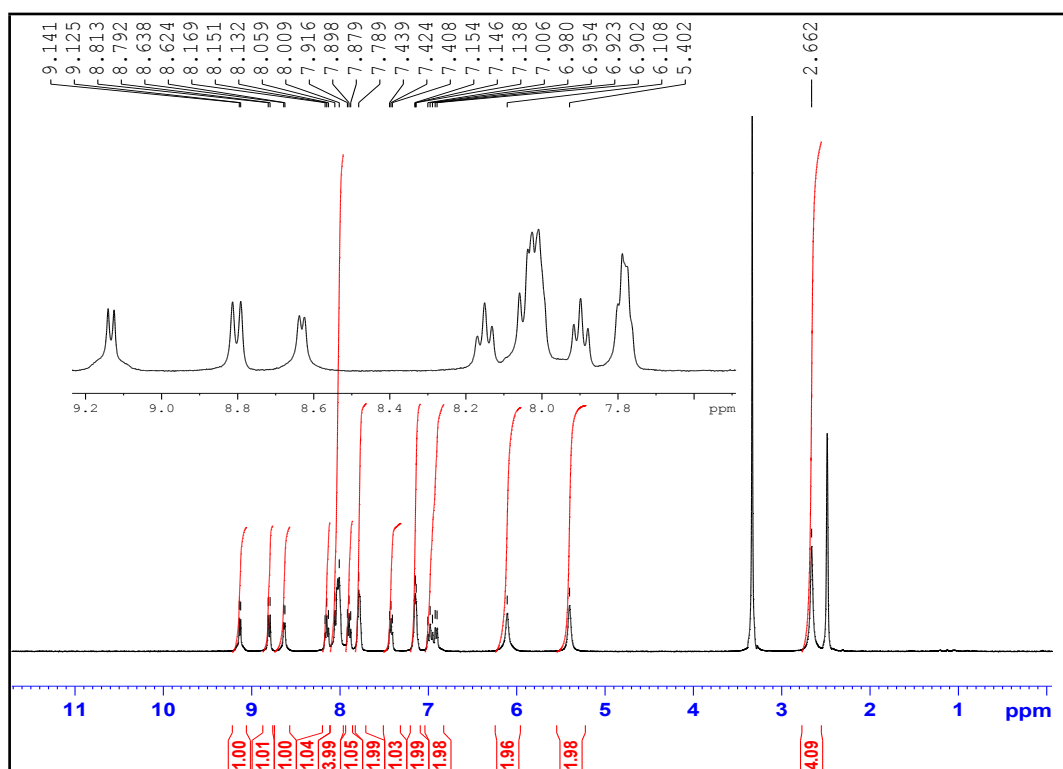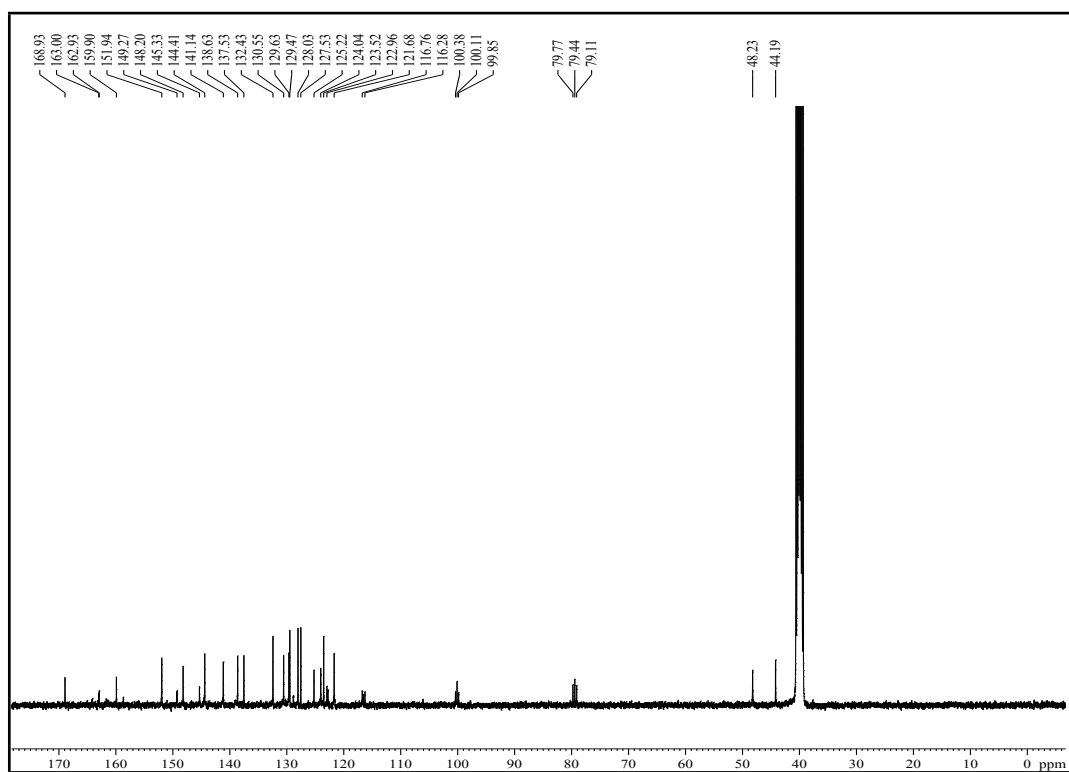

**Fig. S6** <sup>1</sup>H NMR (top) and <sup>13</sup>C NMR (bottom) spectra of complexes S2 in DMSO-*d*<sub>6</sub>

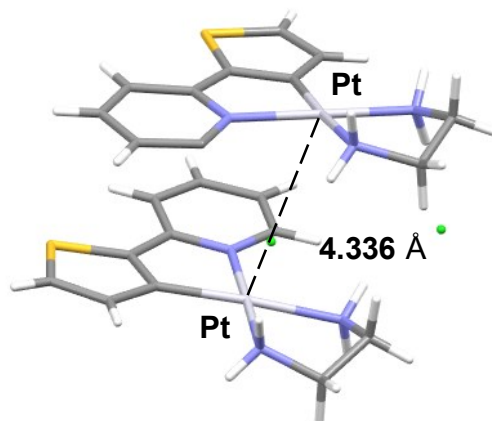

**Fig. S7** Single crystal of **C1** and its packing diagram, showing the absence of Pt···Pt interaction.

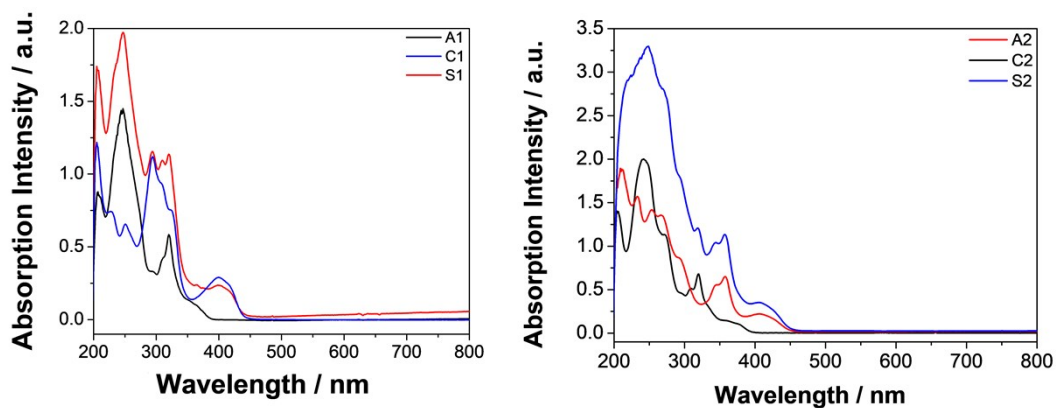

**Fig. S8** UV-Vis spectra of **A1**, **C1**, **S1** and **A2**, **C2**, **S2** in MeOH ( $1 \times 10^{-4}$  M).

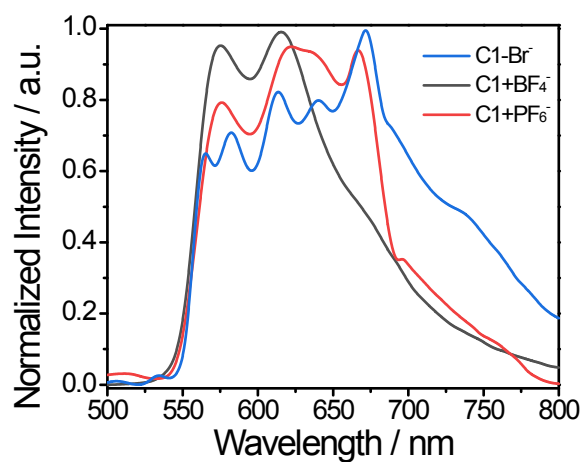

**Fig. S9** PL spectra of cationic complex **C1** with different counterions in the solid state.

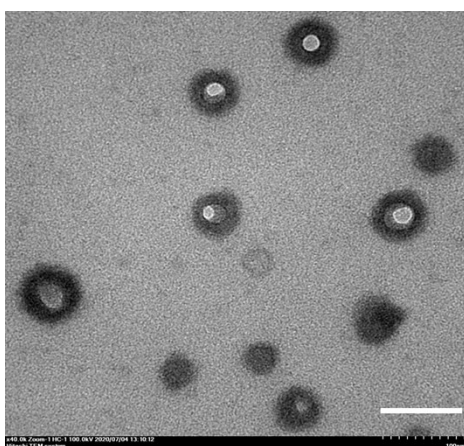

**Fig. S10** TEM image of **S2** dispersed in DMSO/PBS mixture, scale bar = 100 nm.

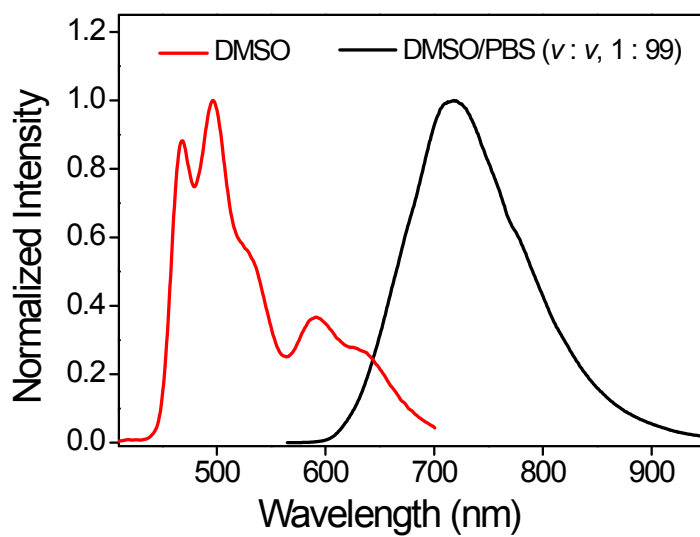

**Fig. S11** PL spectra of **S2** in DMSO and DMSO/PBS (QY = 16.6%) mixture (v : v, 1 : 99).

S2

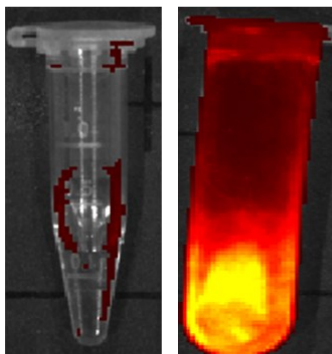

DMSO    DMSO : PBS  
1    :    99

**Fig. S12** PL images of S2 in DMSO and DMSO/PBS mixture ( $v : v$ , 1 : 99).

**Table S1** Selected parameters in S1 crystal

| Selected bond | Bond length / Å | Selected angle    | Bond angle / ° |
|---------------|-----------------|-------------------|----------------|
| Pt(1)-C(13)   | 1.85(5)         | C(13)-Pt(1)-C(1)  | 93.8(16)       |
| Pt(1)-C(1)    | 2.04(3)         | C(13)-Pt(1)-N(3)  | 174.3(15)      |
| Pt(1)-N(3)    | 2.04(2)         | C(1)-Pt(1)-N(3)   | 80.6(9)        |
| Pt(1)-C(12)   | 2.10(4)         | C(13)-Pt(1)-C(12) | 92.5(18)       |
| Pt(2)-C(20)   | 1.99(2)         | C(1)-Pt(1)-C(12)  | 173.8(14)      |
| Pt(2)-N(4)    | 2.063(16)       | N(3)-Pt(1)-C(12)  | 93.2(13)       |
| Pt(2)-N(6)    | 2.093(18)       | C(20)-Pt(2)-N(4)  | 80.6(7)        |
| Pt(2)-N(5)    | 2.171(18)       | C(20)-Pt(2)-N(6)  | 97.1(8)        |
| N(1)-C(12)    | 1.03(4)         | N(4)-Pt(2)-N(6)   | 177.6(8)       |
| N(2)-C(13)    | 1.24(6)         | C(20)-Pt(2)-N(5)  | 179.2(8)       |
|               |                 | N(4)-Pt(2)-N(5)   | 99.1(7)        |
|               |                 | N(6)-Pt(2)-N(5)   | 83.2(8)        |
|               |                 | C(22)-S(1)-C(19)  | 90.0(11)       |

**Table S2** Distance of selected atoms to the dfppy plane (anionic complexes)

| Selected atoms | Distance | Selected atoms | Distance |
|----------------|----------|----------------|----------|
| N4             | 3.346    | C18            | 3.384    |
| S1             | 3.349    | C19            | 3.347    |
| C14            | 3.434    | C20            | 3.337    |
| C15            | 3.384    | C21            | 3.325    |
| C16            | 3.412    | C22            | 3.300    |
| C17            | 3.345    | C23            | 3.349    |
| $\bar{d}$      | 3.360    |                |          |

**Table S3** Common NIR probes for *in vivo* imaging

| Probe                               | Emission wavelength | Quantum yield | Selected reference                                                                  |
|-------------------------------------|---------------------|---------------|-------------------------------------------------------------------------------------|
| S1/S2                               | 674/718 nm          | 20.3/17%      | This work                                                                           |
| Methylene blue                      | 665/686 nm          | 9.6%          | Q. R. J. G. Tummers <i>et al. Surgery</i> 2015, <b>158</b> , 1323–1330              |
| Quaternary ammonium<br>cyanine dyes | 666/692 nm          | 9.7%          | H. Hyun <i>et al. Angew. Chem. Int. Ed.</i> 2015, <b>54</b> , 8648–8652             |
| TPE-TPA-FN                          | 671 nm              | 12.5%         | D. Ding <i>et al. Adv. Health. Mater.</i> 2013, <b>2</b> , 500–507                  |
| AIE dot                             |                     |               |                                                                                     |
| Quantum dots                        | 700-900 nm          | 8-17%         | B. Del Rosal <i>et al. Adv. Funct. Mater.</i> 2016 <b>26</b> , 6060–6068            |
| Metal nanoclusters                  | 810 nm              | 0.7%          | M. X. Yu <i>et al. Angew. Chem. Int. Ed.</i> 2016, <b>55</b> , 2787–<br>2791        |
| Infrared fluorescent<br>proteins    | 711 nm              | 8.0%          | J. Chu <i>et al. Nat. Methods</i> 2014, <b>11</b> , 572–578                         |
| Zwitterionic<br>cyanine dyes        | 772 nm              | 15%           | H. S. Choi <i>et al. Nat. Biotechnol.</i> 2013, <b>31</b> , 148–153                 |
| IR-PEG<br>nanoparticles             | 808 nm              | 1.8%          | X. N. Dang <i>et al. Proc. Natl Acad. Sci. USA</i> 2016, <b>113</b><br>5179–5184    |
| Non-sulfonated<br>cyanine dyes      | 747 nm              | 28%           | M. J. Page, <i>et al. Nat. Commun.</i> 2015, <b>6</b> , 8448                        |
| IRDye800CW                          | 774 nm              | 12%           | L. J. Cruz <i>et al. Nano Res.</i> 2016, <b>9</b> , 1276–1289                       |
| Indocyanine green                   | 807 nm              | 9.3%          | P. E. Burrows <i>et al. Proc. Natl Acad. Sci. USA</i> 2013, <b>110</b><br>8621–8626 |

**References:**



- 1 (a). A. F. Rausch, U. V. Monkowius, M. Zabel and H. Yersin, *Inorg. Chem.*, 2010, **49**, 7818–7825; (b). J. Forniés, S. Fuertes, J. A. López, A. Martín and V. Sicilia, *Inorg. Chem.*, 2008, **47**, 7166–7176;
- 2 S. S. Pasha, P. Das, N. P. Rath, D. Bandyopadhyay, N. R. Jana and I. R. Laskar, *Inorg. Chem. Commun.*, 2016, **67**, 107–111.
- 3 (a). Y. Ma, H. Liang, Y. Zeng, H. Yang, C.-L. Ho, W. Xu, Q. Zhao, W. Huang and W.-Y. Wong, *Chem. Sci.*, 2016, **7**, 3338–3346; (b). V. C.-H. Wong, C. Po, S. Y.-L. Leung, A. K.-W. Chan, S. Yang, B. Zhu, X. Cui and V. W.-W. Yam, *J. Am. Chem. Soc.*, 2018, **140**, 657–666.
